# Supplementary material for: Lipid-inspired biomimicking morphosynthesis of a series of complex concave silica architectures
Source: Royal Society of Chemistry journal article supplement (doi:10.1039/d3cc04101h), 2023-01-01
Supplement: d3cc04101h1.pdf [file d3cc04101h1.pdf]

## **Electronic Supplementary Information (ESI)**

### **Lipid-Inspired Biomimicking Morphosynthesis of Series of Complex Concave Silica Architectures**

Zhengdao Li,<sup>\*a</sup> Chuanyun Yang,<sup>a</sup> Xingjian Zhang,<sup>a</sup> Jiping Shi,<sup>a</sup> Lu Ruan,<sup>a</sup> Qi Liu,<sup>\*b</sup>  
Yongcai Zhang,<sup>d</sup> and Yong Zhou,<sup>\*c, e</sup>

<sup>a</sup> Chemistry and Pharmaceutical Engineering College, Engineering Technology Research Center of Henan Province for Solar Catalysis, Nanyang Normal University, Nanyang, Henan 473061, P. R. China.

<sup>b</sup> School of materials science and engineering, Anhui Polytechnic University, Wuhu, AnHui 241000, P. R. China.

<sup>c</sup> School of Chemical and Environmental Engineering, Anhui Polytechnic University, Wuhu 241000, P. R. China.

<sup>d</sup> School of Chemistry and Chemical Engineering, Yangzhou University, Yangzhou 225009, P. R. China.

<sup>e</sup> School of Physics, Jiangsu Key Laboratory of Nanotechnology, Eco-materials and Renewable Energy Research Center (ERERC), National Laboratory of Solid State Microstructures, Collaborative Innovation Center of Advanced Microstructures, Nanjing University, Nanjing 210093, P. R. China.

E-mail: [nylzd@nynu.edu.cn](mailto:nylzd@nynu.edu.cn); [zhouyong1999@nju.edu.cn](mailto:zhouyong1999@nju.edu.cn); [modieer\\_67@ahpu.edu.cn](mailto:modieer_67@ahpu.edu.cn);

## Experimental Section

**Synthesis of concaved silica architectures:** All the chemicals were obtained from Aladdin Industrial corporation and used as received, unless otherwise stated. Deionized water was prepared with a Milli-Q puritiesystem (18.2 M $\Omega$ ). The detail synthetic procedure of **1** has been described previously.<sup>1</sup> To get the aqueous solution of **1**, **1** (1.0 mg, 2.34  $\mu$ mol) were dissolved in 1 mL of methanol in a round-bottom flask, and then the solution was evaporated at 40 °C with rotary vacuum evaporator for 30 min, followed by further drying in vacuum for 1 h at room temperature for complete removal of the residual methanol. To a lipid thin film formed on the glass wall was added 20 ml of Milli-Q water in the flask. The solution was refluxed at 100 °C for 2 h, and then cooled to 60 °C slowly and stood for 12 h. Finally, the solution was allowed to cool to room temperature. The treated **1** self-assembled into well-defined lipid nanotubes (LNTs) in almost 100% yields in aqueous solution *via* intermolecular hydrogen bonding among the sugar head groups and amide units (shown in Fig. S1, ESI $\dagger$ ). To this aqueous dispersion (10 mL) was added tetramethoxysilane (TMOS, 10  $\mu$ L) at room temperature. The reaction mixture was adjusted to certain pH and stood for 24 h to precipitate. The precipitates were collected by ultracentrifugation, followed by repeated washing with water, and finally dried in vacuum at room temperature.

**Characterizations:** Small angle X-ray diffraction (SAXRD) was conducted on a Bruker D8 Advance diffractometer using Cu K $\alpha$  radiation ( $\lambda = 0.15406$  nm), where the data was collected in the  $2\theta$  range of 20–80° at a step size of 0.02°. Field-emission scanning electron microscopic (FE-SEM) images of solid products were measured on a Nova Nanosem 200 system operated at an acceleration voltage of 15 kV. Both scanning transmission electron microscopic (STEM) were performed on JEOL-3010

instrument. FT-IR spectra were measured with a Thermo Nexus 870 FTIR spectrometer (Thermo Nicolet USA).

### **References**

(S1) S. Kamiya, H. Minamikawa, J. H. Jung, B. Yang, M. Masuda, T. Shimizu, *Langmuir*, 2005, 21, 743-750.



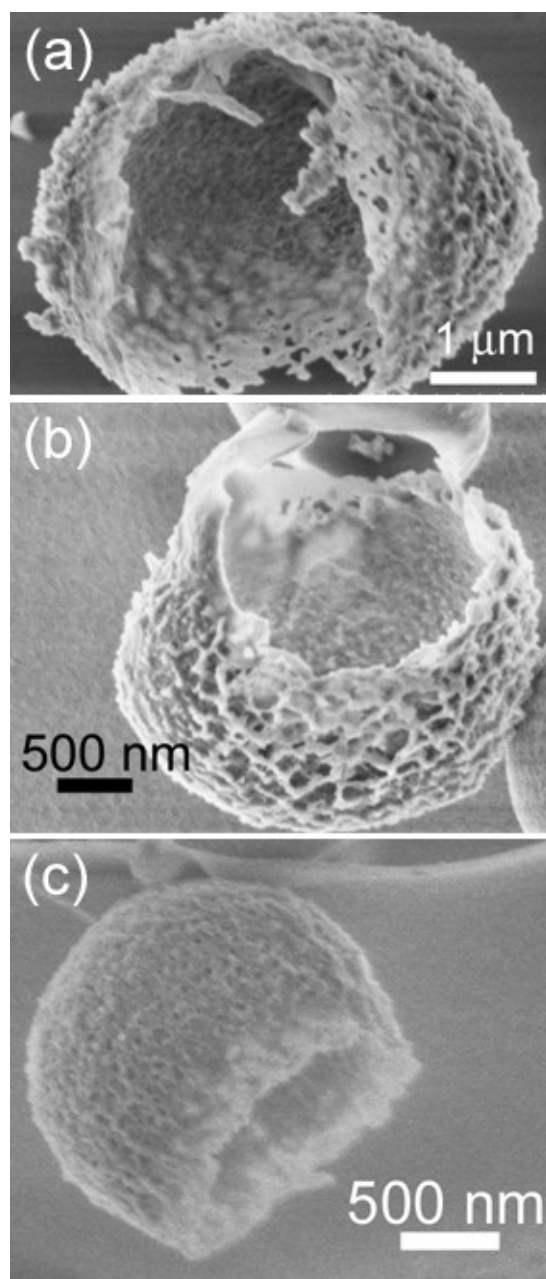

**Fig. S2.** FE-SEM images of porous network-like intermediate of silica architectures.

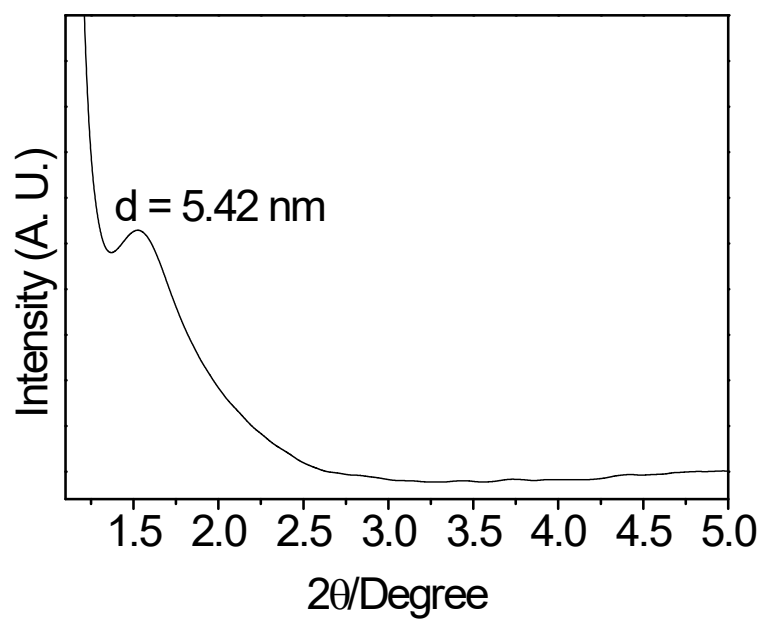

**Fig. S3.** SAXRD pattern of the nanobowl.

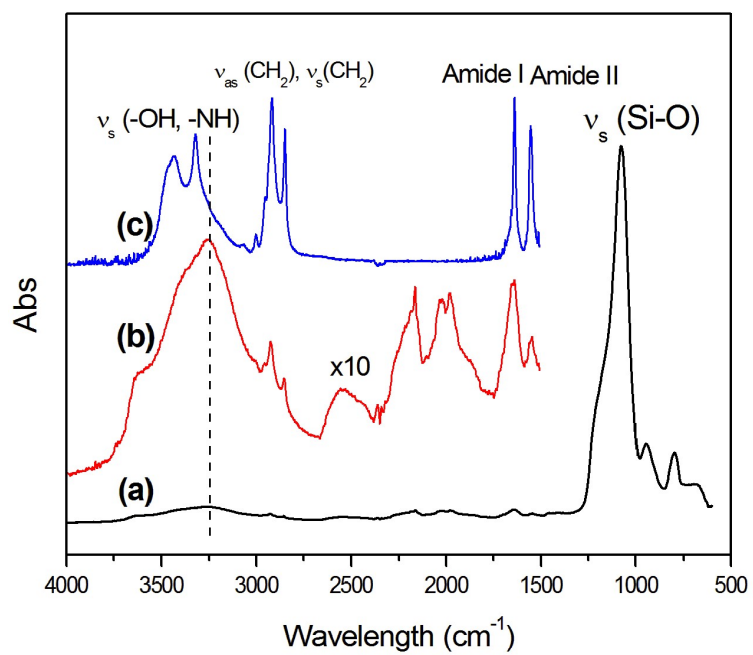

**Fig. S4.** FT-IR spectra of (a) the nanobowl, (b) enlarged spectrum of (a) and (c) pure **1**.

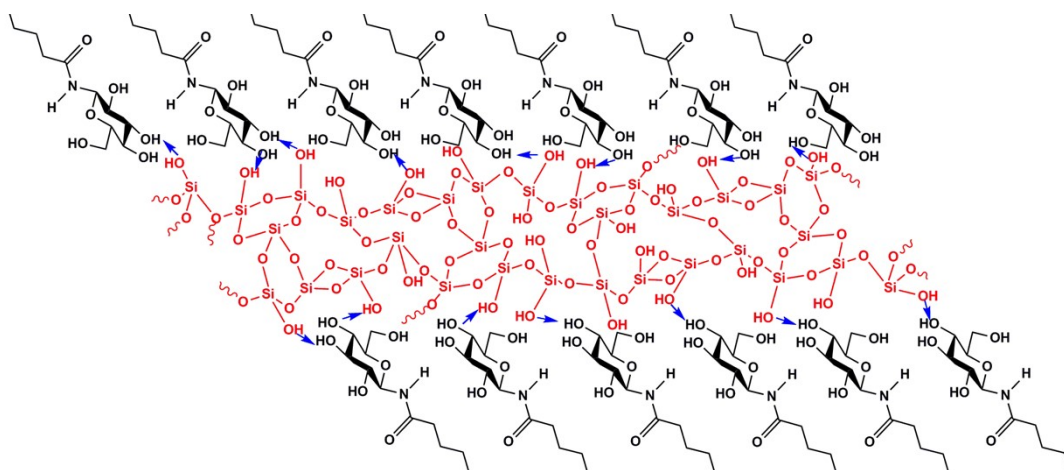

**Fig. S5.** Schematic illustration of the hydrogen bonds formed between **1** and silica.



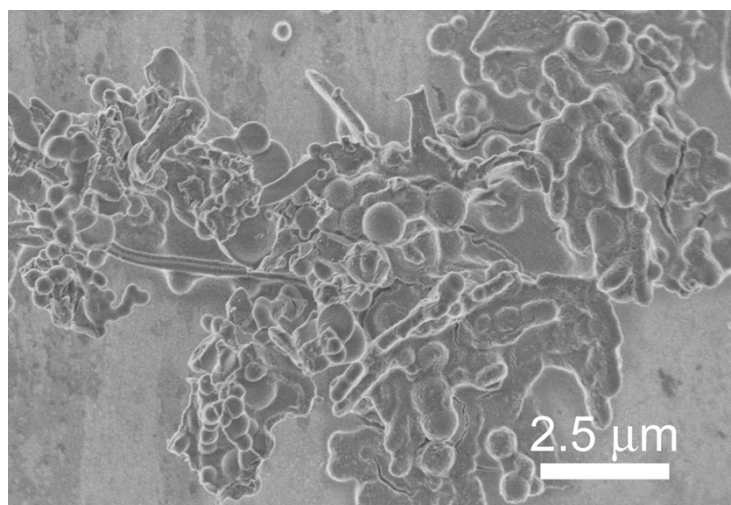

**Fig. S6.** FE-SEM image of the unshaped silica formed with **2**.

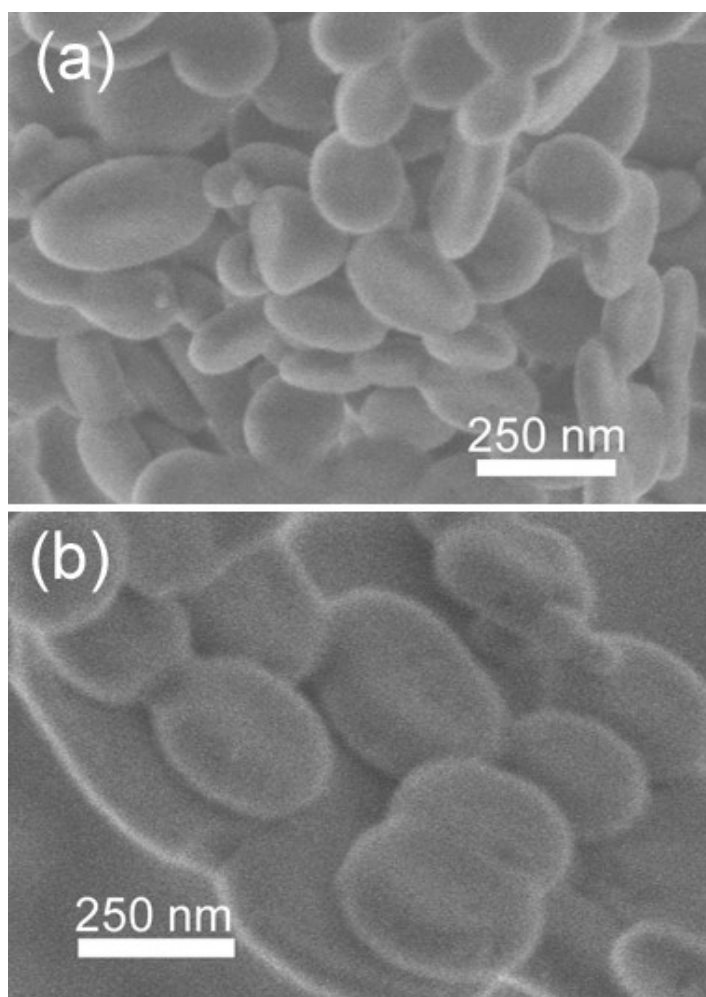

**Fig. S7.** FE-SEM images of the silica nanodish.

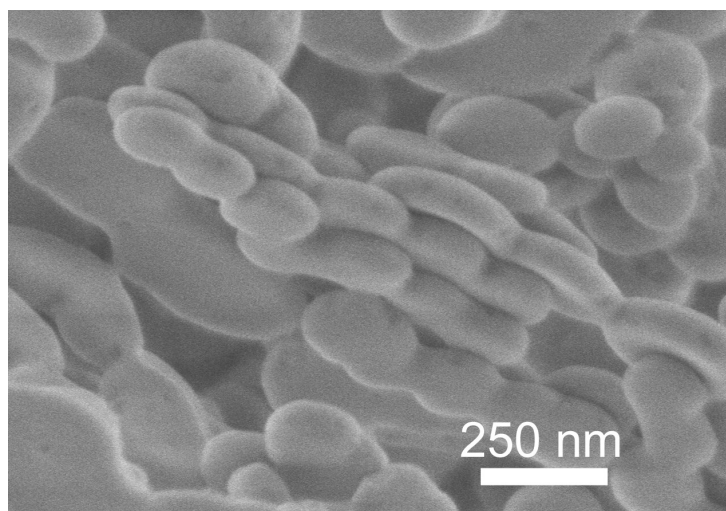

**Fig. S8.** FE-SEM image showing nanodishes face-to-face stack to self-orient each other.

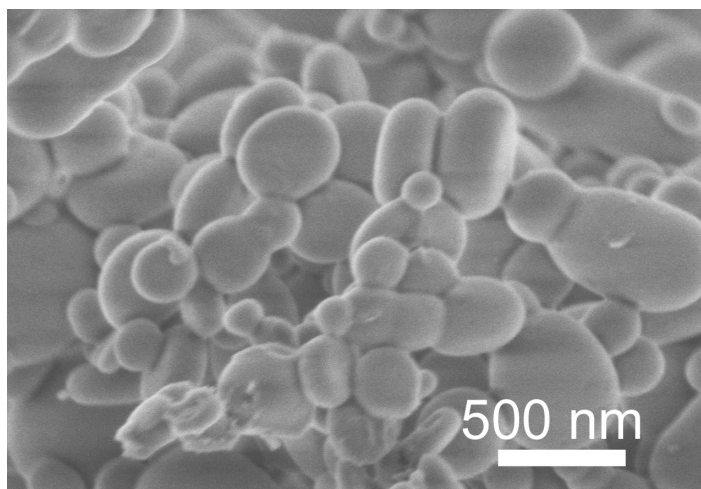

**Fig. S9.** FE-SEM image of the silica spherical particles formed at pH of 11.

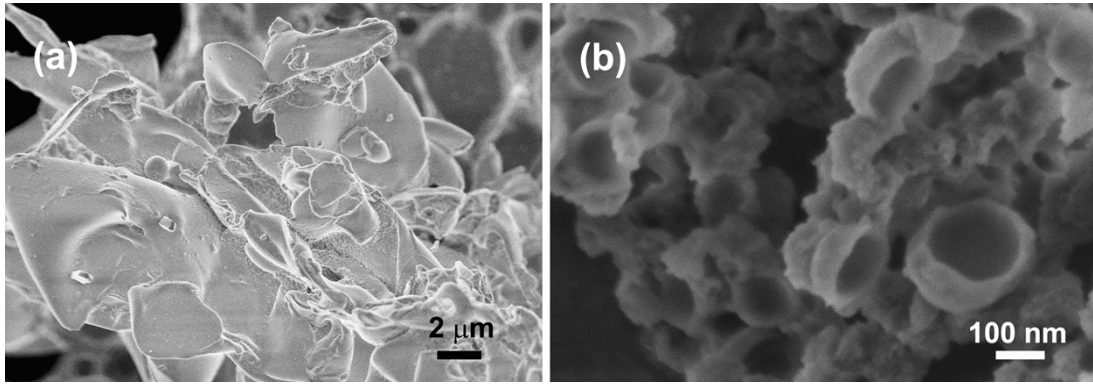

**Fig. S10.** FE-SEM image of the silica spherical particles formed at pH of (a) 2 and (b) 6.
